# Supplementary material for: Theoretical magnetochemistry of dinuclear manganese complexes: broken symmetry density functional theory investigation on the influence of bridging motifs on structure and magnetism
Source: Royal Society of Chemistry journal article supplement (doi:10.1039/c001286f), 2010-01-01
Supplement: c001286f.pdf [file c001286f.pdf]

Electronic Supplementary Information for Dalton Transactions  
This journal is © The Royal Society of Chemistry 2010

**Theoretical magnetochemistry of dinuclear manganese complexes:  
broken symmetry density functional theory investigation on the  
influence of bridging motifs on structure and magnetism**

**Dimitrios A. Pantazis, Vera Krewald, Maylis Orio and Frank Neese**

**ELECTRONIC SUPPLEMENTARY INFORMATION**

### Cartesian coordinates of dinuclear manganese models

---

| ( $\mu$ -O) | IV-IV     |           |           |
|-------------|-----------|-----------|-----------|
| O           | -0.013401 | 0.361402  | 0.278020  |
| Mn          | -0.004157 | 0.280755  | 2.284713  |
| Mn          | 0.005962  | 0.409985  | -1.729544 |
| N           | -0.549040 | 2.315328  | 2.593167  |
| H           | 0.238067  | 2.986452  | 2.544790  |
| H           | -0.992883 | 2.512784  | 3.509815  |
| H           | -1.236457 | 2.653958  | 1.902049  |
| N           | -2.069482 | -0.175841 | 2.519139  |
| H           | -2.539312 | 0.351044  | 3.279362  |
| H           | -2.273719 | -1.168665 | 2.735984  |
| H           | -2.624062 | 0.036496  | 1.676022  |
| N           | 0.097658  | 0.120840  | 4.462061  |
| H           | 0.189501  | 1.027873  | 4.957309  |
| H           | 0.907064  | -0.435791 | 4.796367  |
| H           | -0.727929 | -0.331056 | 4.898927  |
| N           | 0.432662  | -1.798750 | 2.346637  |
| H           | 0.118834  | -2.285411 | 3.207399  |
| H           | 1.438650  | -2.033744 | 2.279826  |
| H           | -0.015749 | -2.316263 | 1.575315  |
| N           | 1.218858  | 2.147067  | -1.922625 |
| H           | 2.206850  | 1.962115  | -2.175904 |
| H           | 1.262097  | 2.703374  | -1.055316 |
| H           | 0.893611  | 2.816693  | -2.645224 |
| N           | -1.291238 | -1.258308 | -1.991004 |
| H           | -0.817982 | -2.148295 | -2.231206 |
| H           | -1.849915 | -1.469525 | -1.150866 |
| H           | -1.988164 | -1.138808 | -2.750109 |
| N           | 0.055462  | 0.348111  | -3.915245 |
| H           | 0.247230  | -0.598434 | -4.294608 |
| H           | -0.829758 | 0.633349  | -4.375022 |
| H           | 0.779109  | 0.953947  | -4.346426 |
| N           | -1.668326 | 1.708098  | -1.936863 |
| H           | -1.707796 | 2.227854  | -2.833855 |
| H           | -2.589400 | 1.238961  | -1.876649 |
| H           | -1.692181 | 2.446671  | -1.216551 |
| N           | 1.750762  | -0.793609 | -1.894364 |
| H           | 2.305600  | -0.642281 | -2.757797 |
| H           | 1.576653  | -1.814119 | -1.885882 |
| H           | 2.416263  | -0.628955 | -1.123841 |
| N           | 2.042894  | 0.820698  | 2.509619  |
| H           | 2.223570  | 1.485524  | 3.285267  |
| H           | 2.434169  | 1.278801  | 1.673210  |
| H           | 2.684081  | 0.031568  | 2.709875  |

| <b>(<math>\mu</math>-O)</b> | <b>III-III</b> |           |           |
|-----------------------------|----------------|-----------|-----------|
| O                           | -0.019951      | 0.373379  | 0.280031  |
| Mn                          | 0.003178       | 0.288689  | 2.192129  |
| Mn                          | -0.003236      | 0.402272  | -1.636833 |
| N                           | -0.568872      | 2.406864  | 2.512382  |
| H                           | 0.208143       | 3.076857  | 2.443243  |
| H                           | -0.994641      | 2.598861  | 3.429774  |
| H                           | -1.261434      | 2.728463  | 1.826611  |
| N                           | -2.145626      | -0.198371 | 2.416632  |
| H                           | -2.616419      | 0.308025  | 3.179269  |
| H                           | -2.350910      | -1.189462 | 2.601383  |
| H                           | -2.675993      | 0.036171  | 1.570230  |
| N                           | 0.099932       | 0.120886  | 4.528247  |
| H                           | 0.211808       | 1.011481  | 5.032837  |
| H                           | 0.885060       | -0.449609 | 4.872406  |
| H                           | -0.724269      | -0.307384 | 4.972748  |
| N                           | 0.481239       | -1.870726 | 2.255730  |
| H                           | 0.072982       | -2.375589 | 3.054587  |
| H                           | 1.484223       | -2.093670 | 2.299137  |
| H                           | 0.135305       | -2.354615 | 1.419821  |
| N                           | 1.269550       | 2.204654  | -1.817850 |
| H                           | 2.256299       | 2.019717  | -2.042987 |
| H                           | 1.286163       | 2.744061  | -0.945218 |
| H                           | 0.961321       | 2.869460  | -2.540846 |
| N                           | -1.358070      | -1.330054 | -1.900207 |
| H                           | -0.895027      | -2.209621 | -2.165401 |
| H                           | -1.885090      | -1.549810 | -1.047839 |
| H                           | -2.068304      | -1.190283 | -2.632185 |
| N                           | 0.052508       | 0.348626  | -3.982556 |
| H                           | 0.258943       | -0.581707 | -4.372699 |
| H                           | -0.822511      | 0.617269  | -4.454231 |
| H                           | 0.759213       | 0.957070  | -4.419227 |
| N                           | -1.744298      | 1.759390  | -1.853458 |
| H                           | -1.785510      | 2.256570  | -2.753921 |
| H                           | -2.660754      | 1.300615  | -1.769771 |
| H                           | -1.749588      | 2.499549  | -1.142410 |
| N                           | 1.801798       | -0.867561 | -1.807495 |
| H                           | 2.405696       | -0.645532 | -2.611041 |
| H                           | 1.617417       | -1.875167 | -1.898819 |
| H                           | 2.402396       | -0.779313 | -0.980458 |
| N                           | 2.133113       | 0.856864  | 2.419610  |
| H                           | 2.298946       | 1.550703  | 3.161786  |
| H                           | 2.523212       | 1.272262  | 1.566518  |
| H                           | 2.766713       | 0.081608  | 2.656312  |

**( $\mu$ -O)<sub>2</sub> IV-IV**

|    |           |           |           |
|----|-----------|-----------|-----------|
| O  | 1.292359  | 0.015839  | 1.500665  |
| Mn | 0.043401  | 0.011800  | 2.869069  |
| O  | -1.101060 | 0.003814  | 1.419287  |
| Mn | 0.147254  | 0.006845  | 0.051782  |
| N  | 0.036788  | -2.068265 | 3.155162  |
| N  | -1.608840 | 0.008145  | 4.262632  |
| N  | 0.046288  | 2.093282  | 3.150206  |
| N  | 1.616123  | 0.023560  | 4.362912  |
| N  | -1.425308 | 0.006433  | -1.440058 |
| N  | 1.808405  | 0.008669  | -1.337602 |
| N  | 0.184776  | -2.073674 | -0.234858 |
| N  | 0.129833  | 2.086817  | -0.247195 |
| H  | 0.187678  | 2.348366  | -1.243876 |
| H  | -0.731346 | 2.538037  | 0.092394  |
| H  | 0.925803  | 2.563985  | 0.198615  |
| H  | 0.278334  | -2.336831 | -1.228507 |
| H  | 0.978626  | -2.531418 | 0.234154  |
| H  | -0.675615 | -2.540132 | 0.085896  |
| H  | 1.599573  | -0.179950 | -2.330811 |
| H  | 2.337806  | 0.893398  | -1.341038 |
| H  | 2.514602  | -0.692733 | -1.066448 |
| H  | -1.777751 | -0.924271 | -1.709260 |
| H  | -2.253796 | 0.480634  | -1.047649 |
| H  | -1.234466 | 0.475133  | -2.339332 |
| H  | -0.079586 | -2.337472 | 4.144644  |
| H  | -0.735287 | -2.539267 | 2.663845  |
| H  | 0.915187  | -2.515495 | 2.856185  |
| H  | -0.047740 | 2.367444  | 4.140551  |
| H  | 0.920123  | 2.536583  | 2.832759  |
| H  | -0.733345 | 2.565724  | 2.672282  |
| H  | 1.785015  | -0.861855 | 4.863536  |
| H  | 2.505696  | 0.221678  | 3.877508  |
| H  | 1.552153  | 0.724733  | 5.116711  |
| H  | -1.380736 | -0.080766 | 5.265561  |
| H  | -2.193291 | 0.854943  | 4.193461  |
| H  | -2.271460 | -0.756698 | 4.062665  |

**( $\mu$ -O)<sub>2</sub> III-IV**

|    |           |           |           |
|----|-----------|-----------|-----------|
| O  | 1.312678  | 0.034155  | 1.657589  |
| Mn | 0.046654  | 0.018865  | 2.935179  |
| O  | -1.129634 | -0.009928 | 1.574624  |
| Mn | 0.141742  | 0.004669  | 0.161981  |
| N  | 0.080541  | -2.063369 | 3.081833  |
| N  | -1.589697 | -0.012836 | 4.375085  |
| N  | 0.003884  | 2.101865  | 3.062349  |
| N  | 1.584683  | 0.061734  | 4.480067  |
| N  | -1.471381 | -0.033865 | -1.260031 |

|   |           |           |           |
|---|-----------|-----------|-----------|
| N | 1.853795  | 0.031560  | -1.139651 |
| N | 0.210193  | -2.436767 | -0.425852 |
| N | 0.116620  | 2.439330  | -0.449855 |
| H | 0.143771  | 2.567946  | -1.469914 |
| H | -0.717927 | 2.964432  | -0.160582 |
| H | 0.910918  | 2.997852  | -0.113621 |
| H | 0.255946  | -2.573346 | -1.444201 |
| H | 1.020615  | -2.961049 | -0.073399 |
| H | -0.607333 | -2.991197 | -0.142686 |
| H | 1.693659  | 0.043975  | -2.154919 |
| H | 2.443342  | 0.848496  | -0.937960 |
| H | 2.459058  | -0.779108 | -0.960742 |
| H | -2.066980 | -0.857148 | -1.108118 |
| H | -2.095498 | 0.770287  | -1.120590 |
| H | -1.236850 | -0.037709 | -2.260806 |
| H | 0.037516  | -2.471959 | 4.023886  |
| H | -0.714704 | -2.447272 | 2.558766  |
| H | 0.940507  | -2.415641 | 2.645838  |
| H | -0.014456 | 2.517654  | 4.002072  |
| H | 0.831720  | 2.482177  | 2.589602  |
| H | -0.825586 | 2.450985  | 2.568533  |
| H | 1.707248  | -0.792581 | 5.038507  |
| H | 2.475547  | 0.189992  | 3.980282  |
| H | 1.540855  | 0.816834  | 5.176360  |
| H | -1.589800 | -0.760989 | 5.080186  |
| H | -1.749159 | 0.846744  | 4.915842  |
| H | -2.446291 | -0.147754 | 3.820192  |

**( $\mu$ -O)<sub>2</sub> III-III**

|    |           |           |           |
|----|-----------|-----------|-----------|
| O  | 1.340299  | 0.014276  | 1.499681  |
| Mn | 0.053571  | 0.015468  | 2.837546  |
| O  | -1.142698 | 0.003406  | 1.417619  |
| Mn | 0.144068  | 0.002976  | 0.079800  |
| N  | -0.348238 | -2.422833 | 3.237801  |
| N  | -1.615146 | 0.242541  | 4.200748  |
| N  | 0.434420  | 2.459756  | 3.238269  |
| N  | 1.622889  | -0.193880 | 4.316571  |
| N  | -1.423905 | -0.229083 | -1.396892 |
| N  | 1.809829  | 0.227632  | -1.287416 |
| N  | 0.559241  | -2.436776 | -0.297410 |
| N  | -0.248767 | 2.441545  | -0.343224 |
| H  | -0.459659 | 2.846338  | -1.262232 |
| H  | -1.092742 | 2.575991  | 0.222280  |
| H  | 0.471353  | 3.049736  | 0.058249  |
| H  | 0.825418  | -2.849767 | -1.198231 |
| H  | 1.365933  | -2.569330 | 0.320558  |
| H  | -0.186712 | -3.039113 | 0.063693  |

|   |           |           |           |
|---|-----------|-----------|-----------|
| H | 1.920865  | -0.464142 | -2.035117 |
| H | 1.861901  | 1.147773  | -1.735114 |
| H | 2.635575  | 0.150559  | -0.682032 |
| H | -1.450232 | -1.153849 | -1.837317 |
| H | -2.290346 | -0.141053 | -0.852991 |
| H | -1.477065 | 0.454740  | -2.158133 |
| H | -0.613579 | -2.830391 | 4.141339  |
| H | -1.153640 | -2.563531 | 2.619956  |
| H | 0.401012  | -3.024132 | 2.881865  |
| H | 0.644214  | 2.873098  | 4.153701  |
| H | 1.277867  | 2.591591  | 2.671377  |
| H | -0.287599 | 3.062211  | 2.831599  |
| H | 1.658395  | -1.118350 | 4.756984  |
| H | 2.489669  | -0.096188 | 3.774952  |
| H | 1.666042  | 0.490292  | 5.078147  |
| H | -1.717567 | -0.434716 | 4.962850  |
| H | -1.678621 | 1.171148  | 4.629136  |
| H | -2.439849 | 0.143097  | 3.597236  |

**( $\mu$ -O)<sub>3</sub> IV-IV**

|    |           |           |           |
|----|-----------|-----------|-----------|
| O  | 1.266341  | -0.239788 | 1.357215  |
| Mn | 0.023409  | -0.133349 | 2.735298  |
| O  | -0.192882 | -1.935792 | 2.337859  |
| Mn | -0.079739 | -1.274472 | 0.606757  |
| O  | -1.158017 | 0.062585  | 1.318847  |
| N  | 1.511345  | -0.568197 | 4.187906  |
| N  | -1.568147 | -0.184367 | 4.140310  |
| N  | 0.285666  | 1.968666  | 2.891155  |
| N  | -1.772403 | -2.404400 | 0.000787  |
| N  | 1.307981  | -2.782630 | 0.049365  |
| N  | 0.078148  | -0.249114 | -1.246981 |
| H  | -1.797981 | -2.893775 | -0.900460 |
| H  | -1.935382 | -3.104476 | 0.734257  |
| H  | -2.579307 | -1.769708 | 0.027578  |
| H  | 0.972035  | 0.256256  | -1.231906 |
| H  | 0.023395  | -0.747447 | -2.142000 |
| H  | -0.655342 | 0.469700  | -1.251716 |
| H  | 1.263927  | -3.243989 | -0.865867 |
| H  | 2.241909  | -2.364365 | 0.136678  |
| H  | 1.256513  | -3.517292 | 0.765088  |
| H  | 0.359217  | 2.435748  | 3.801555  |
| H  | 1.136775  | 2.193841  | 2.362259  |
| H  | -0.490823 | 2.408442  | 2.383009  |
| H  | 1.541036  | -0.083317 | 5.091474  |
| H  | 1.446460  | -1.574479 | 4.382584  |
| H  | 2.420784  | -0.423949 | 3.733142  |
| H  | -1.510246 | 0.315301  | 5.034401  |

|   |           |           |          |
|---|-----------|-----------|----------|
| H | -2.404139 | 0.157562  | 3.651649 |
| H | -1.746121 | -1.173022 | 4.353642 |

|    | <b>(<math>\mu</math>-O)(<math>\mu</math>-OAc)</b> | <b>IV-IV</b> |           |
|----|---------------------------------------------------|--------------|-----------|
| Mn | 0.660126                                          | 2.430665     | 0.214521  |
| Mn | 0.906169                                          | 2.481023     | 3.743651  |
| O  | 0.596011                                          | 3.061663     | 1.982779  |
| O  | 1.233120                                          | 0.713265     | 0.830581  |
| O  | 1.384467                                          | 0.744908     | 3.105807  |
| C  | 1.490280                                          | 0.130198     | 1.964068  |
| C  | 1.912452                                          | -1.291518    | 1.955796  |
| H  | 2.600300                                          | -1.511788    | 2.788294  |
| H  | 1.017034                                          | -1.933176    | 2.115432  |
| H  | 2.348119                                          | -1.580554    | 0.987788  |
| N  | 0.008846                                          | 4.286332     | -0.586019 |
| H  | 0.759702                                          | 4.887496     | -0.964441 |
| H  | -0.680530                                         | 4.224185     | -1.354621 |
| H  | -0.444423                                         | 4.855690     | 0.146104  |
| N  | 0.796199                                          | 1.569597     | -1.763616 |
| H  | 0.683239                                          | 2.204193     | -2.572879 |
| H  | 1.709187                                          | 1.104409     | -1.900985 |
| H  | 0.113316                                          | 0.809075     | -1.918059 |
| N  | 0.414196                                          | 4.374653     | 4.570395  |
| H  | 1.103802                                          | 4.761379     | 5.236946  |
| H  | -0.483594                                         | 4.414209     | 5.081424  |
| H  | 0.329018                                          | 5.080289     | 3.821782  |
| N  | 1.291005                                          | 1.674008     | 5.709976  |
| H  | 1.091711                                          | 2.279267     | 6.525092  |
| H  | 2.273034                                          | 1.373145     | 5.826428  |
| H  | 0.753361                                          | 0.805974     | 5.872636  |
| N  | 2.634046                                          | 3.061906     | -0.174794 |
| H  | 2.806371                                          | 3.314085     | -1.163161 |
| H  | 3.326169                                          | 2.323723     | 0.031163  |
| H  | 2.915576                                          | 3.894209     | 0.363495  |
| N  | -1.362554                                         | 1.845072     | 0.120226  |
| H  | -1.786892                                         | 1.942673     | -0.817957 |
| H  | -1.489172                                         | 0.849616     | 0.364274  |
| H  | -1.978698                                         | 2.387577     | 0.742637  |
| N  | -1.084744                                         | 1.910244     | 4.137116  |
| H  | -1.359437                                         | 2.003302     | 5.130048  |
| H  | -1.257757                                         | 0.917863     | 3.910466  |
| H  | -1.782000                                         | 2.462414     | 3.616813  |
| N  | 2.914535                                          | 3.118578     | 3.827437  |
| H  | 3.108813                                          | 3.941620     | 3.238669  |
| H  | 3.569853                                          | 2.376401     | 3.534266  |
| H  | 3.233128                                          | 3.391238     | 4.772918  |

| <b>(<math>\mu</math>-O)(<math>\mu</math>-OAc)</b> |           | <b>III-IV</b>  |           |
|---------------------------------------------------|-----------|----------------|-----------|
| Mn                                                | 0.625615  | 2.442974       | 0.197147  |
| O                                                 | 0.556568  | 3.102805       | 1.844789  |
| O                                                 | 1.385681  | 0.744757       | 3.012485  |
| H                                                 | 1.009907  | -1.920976      | 2.056324  |
| H                                                 | 0.631127  | 5.057146       | -0.382063 |
| H                                                 | -0.128894 | 4.328013       | -1.644197 |
| N                                                 | 0.722257  | 1.591014       | -1.819004 |
| H                                                 | 1.035602  | 0.614029       | -1.714649 |
| H                                                 | -0.157740 | 1.534221       | -2.352281 |
| N                                                 | 0.385508  | 4.428931       | 4.454480  |
| H                                                 | 1.157415  | 4.920244       | 4.926756  |
| H                                                 | -0.391525 | 4.426254       | 5.130206  |
| H                                                 | 0.086971  | 5.050633       | 3.690837  |
| H                                                 | 1.201150  | 2.352137       | 6.444611  |
| H                                                 | 2.271417  | 1.360479       | 5.690027  |
| H                                                 | 0.713362  | 0.906283       | 5.836294  |
| N                                                 | -1.361826 | 1.873732       | 4.229829  |
| H                                                 | -1.570874 | 1.935709       | 5.236789  |
| H                                                 | -1.575637 | 0.893678       | 4.000898  |
| H                                                 | -2.118390 | 2.421654       | 3.800289  |
| N                                                 | 3.198824  | 3.243819       | 3.839750  |
| H                                                 | 3.458206  | 4.097293       | 3.328352  |
| H                                                 | 3.873754  | 2.530687       | 3.532170  |
| H                                                 | 3.492781  | 3.451853       | 4.805062  |
| Mn                                                | 0.899436  | 2.515226       | 3.683013  |
| O                                                 | 1.209876  | 0.707164       | 0.741686  |
| C                                                 | 1.478091  | 0.142404       | 1.893437  |
| C                                                 | 1.897913  | -1.289819      | 1.860975  |
| H                                                 | 2.619598  | -1.498910      | 2.662852  |
| H                                                 | 2.302900  | -1.573939      | 0.882468  |
| N                                                 | -0.014071 | 4.290460       | -0.620285 |
| H                                                 | -0.918267 | 4.585013       | -0.224637 |
| H                                                 | 1.387208  | 2.016694       | -2.481316 |
| N                                                 | 1.308882  | 1.722244       | 5.636756  |
| N                                                 | 2.607042  | 3.023950       | -0.134327 |
| H                                                 | 2.784167  | 3.537209       | -1.010390 |
| H                                                 | 3.225982  | 2.200512       | -0.161679 |
| H                                                 | 2.946490  | 3.629000       | 0.622536  |
| N                                                 | -1.364062 | 1.798567       | 0.192023  |
| H                                                 | -1.928399 | 2.089991       | -0.619737 |
| H                                                 | -1.412280 | 0.769391       | 0.211714  |
| H                                                 | -1.865246 | 2.137250       | 1.021696  |
| <b>(<math>\mu</math>-O)(<math>\mu</math>-OAc)</b> |           | <b>III-III</b> |           |
| Mn                                                | 0.660520  | 2.444122       | 0.288374  |
| Mn                                                | 0.898716  | 2.495807       | 3.668965  |



|                                                               |           |           |           |
|---------------------------------------------------------------|-----------|-----------|-----------|
| O                                                             | 0.577859  | 3.140121  | 1.982774  |
| O                                                             | 1.293368  | 0.654042  | 0.834829  |
| O                                                             | 1.378794  | 0.666677  | 3.100107  |
| C                                                             | 1.514494  | 0.084369  | 1.963946  |
| C                                                             | 1.937220  | -1.355751 | 1.955976  |
| H                                                             | 2.543802  | -1.592636 | 2.837342  |
| H                                                             | 1.033386  | -1.987334 | 1.993997  |
| H                                                             | 2.474027  | -1.602849 | 1.033089  |
| N                                                             | -0.048754 | 4.342785  | -0.499963 |
| H                                                             | 0.696498  | 4.958616  | -0.846660 |
| H                                                             | -0.743866 | 4.297207  | -1.254854 |
| H                                                             | -0.495062 | 4.851858  | 0.271505  |
| N                                                             | 0.780426  | 1.630964  | -1.709259 |
| H                                                             | 1.152981  | 2.238633  | -2.448370 |
| H                                                             | 1.408938  | 0.818593  | -1.656352 |
| H                                                             | -0.106089 | 1.264358  | -2.074996 |
| N                                                             | 0.434191  | 4.459924  | 4.483248  |
| H                                                             | 1.066118  | 4.813561  | 5.211733  |
| H                                                             | -0.512521 | 4.546729  | 4.871867  |
| H                                                             | 0.481890  | 5.133424  | 3.710159  |
| N                                                             | 1.251040  | 1.725676  | 5.655764  |
| H                                                             | 0.650401  | 2.066213  | 6.415841  |
| H                                                             | 2.214371  | 1.850487  | 5.988270  |
| H                                                             | 1.112287  | 0.707800  | 5.608436  |
| N                                                             | 2.908085  | 3.143362  | -0.191056 |
| H                                                             | 3.153263  | 3.380397  | -1.160440 |
| H                                                             | 3.565387  | 2.397391  | 0.064808  |
| H                                                             | 3.191201  | 3.964513  | 0.354104  |
| N                                                             | -1.619143 | 1.692227  | 0.199430  |
| H                                                             | -2.158805 | 1.839889  | -0.662618 |
| H                                                             | -1.678800 | 0.682332  | 0.375509  |
| H                                                             | -2.182199 | 2.136994  | 0.931236  |
| N                                                             | -1.359374 | 1.828782  | 4.145405  |
| H                                                             | -1.681123 | 1.858608  | 5.120913  |
| H                                                             | -1.504656 | 0.854119  | 3.857705  |
| H                                                             | -2.053140 | 2.379433  | 3.628423  |
| N                                                             | 3.210042  | 3.143688  | 3.762318  |
| H                                                             | 3.422120  | 3.857129  | 3.057610  |
| H                                                             | 3.820321  | 2.346704  | 3.545776  |
| H                                                             | 3.585171  | 3.530143  | 4.637608  |
| <b>(<math>\mu</math>-O)(<math>\mu</math>-OAc)<sub>2</sub></b> |           |           |           |
| O                                                             | 1.441658  | 2.754416  | 1.319780  |
| Mn                                                            | 1.014568  | 1.919926  | 2.895722  |
| Mn                                                            | 2.538913  | 2.100052  | 0.006678  |
| O                                                             | 1.702579  | 0.372929  | 0.023939  |
| O                                                             | 0.648950  | 0.244481  | 2.029158  |

|   |           |           |           |
|---|-----------|-----------|-----------|
| O | 2.842332  | 1.464966  | 3.266337  |
| O | 3.900949  | 1.586569  | 1.263582  |
| C | 0.980334  | -0.262814 | 0.887407  |
| C | 3.903399  | 1.358232  | 2.535644  |
| C | 5.175677  | 0.940472  | 3.183005  |
| C | 0.525567  | -1.640195 | 0.559791  |
| H | -0.397918 | -1.896062 | 1.096340  |
| H | 0.408660  | -1.775633 | -0.524279 |
| H | 1.309653  | -2.349103 | 0.894675  |
| H | 5.230631  | -0.166382 | 3.150817  |
| H | 6.047838  | 1.326799  | 2.638279  |
| H | 5.202588  | 1.237064  | 4.240445  |
| N | 1.223022  | 2.666459  | -1.525302 |
| N | 3.833236  | 1.269814  | -1.467522 |
| N | 3.533852  | 3.933516  | -0.220911 |
| H | 1.654450  | 3.001869  | -2.399550 |
| H | 0.637781  | 1.861579  | -1.795299 |
| H | 0.578043  | 3.409583  | -1.220517 |
| H | 3.039693  | 4.688226  | 0.275800  |
| H | 4.475634  | 3.874898  | 0.195418  |
| H | 3.672149  | 4.271801  | -1.184923 |
| H | 3.424850  | 0.396956  | -1.835246 |
| H | 4.101350  | 1.829938  | -2.290008 |
| H | 4.716612  | 0.996310  | -1.010588 |
| N | -1.022732 | 2.383466  | 2.717420  |
| H | -1.489405 | 2.751172  | 3.559955  |
| H | -1.182386 | 3.080833  | 1.976683  |
| H | -1.552213 | 1.540306  | 2.448276  |
| N | 1.278921  | 3.675975  | 4.012350  |
| H | 1.207053  | 4.516849  | 3.421818  |
| H | 2.223890  | 3.685119  | 4.424904  |
| H | 0.630838  | 3.822770  | 4.800682  |
| N | 0.577403  | 0.886539  | 4.706628  |
| H | 1.447340  | 0.749591  | 5.243583  |
| H | 0.239805  | -0.059782 | 4.472999  |
| H | -0.109799 | 1.276812  | 5.368087  |

|    | <b>(<math>\mu</math>-O)(<math>\mu</math>-OAc)<sub>2</sub></b> | <b>III-IV</b> |           |
|----|---------------------------------------------------------------|---------------|-----------|
| Mn | 0.965486                                                      | 1.989064      | 2.914059  |
| O  | 1.715174                                                      | 0.321904      | 0.032106  |
| O  | 3.926513                                                      | 1.546967      | 1.278642  |
| C  | 3.941052                                                      | 1.329168      | 2.568136  |
| C  | 5.254727                                                      | 0.892567      | 3.147296  |
| C  | 0.561894                                                      | -1.711562     | 0.500420  |
| H  | -0.377074                                                     | -1.989864     | 0.992533  |
| H  | 0.484716                                                      | -1.820083     | -0.587359 |
| H  | 1.346656                                                      | -2.404282     | 0.850606  |

|                                                               |           |           |           |
|---------------------------------------------------------------|-----------|-----------|-----------|
| H                                                             | 5.286545  | -0.210660 | 3.128393  |
| H                                                             | 6.101300  | 1.260801  | 2.557331  |
| H                                                             | 5.335667  | 1.209775  | 4.193683  |
| N                                                             | 1.184300  | 2.620882  | -1.483659 |
| N                                                             | 3.536127  | 3.919060  | -0.161320 |
| H                                                             | 1.579533  | 3.023331  | -2.342599 |
| H                                                             | 0.654121  | 1.788782  | -1.772737 |
| H                                                             | 0.501085  | 3.299168  | -1.126240 |
| H                                                             | 3.006824  | 4.659710  | 0.313874  |
| H                                                             | 4.449498  | 3.858909  | 0.307004  |
| H                                                             | 3.721620  | 4.254536  | -1.114739 |
| N                                                             | 0.529884  | 0.959407  | 4.694817  |
| H                                                             | 1.415892  | 0.756369  | 5.177556  |
| H                                                             | 0.117111  | 0.048158  | 4.453003  |
| H                                                             | -0.092767 | 1.393330  | 5.386850  |
| O                                                             | 1.433464  | 2.780039  | 1.301284  |
| Mn                                                            | 2.523647  | 2.062175  | 0.072359  |
| O                                                             | 0.597272  | 0.164789  | 1.996574  |
| O                                                             | 2.926611  | 1.451138  | 3.309913  |
| C                                                             | 0.964542  | -0.319639 | 0.890364  |
| N                                                             | 3.825069  | 1.234939  | -1.423437 |
| H                                                             | 3.429106  | 0.333919  | -1.722428 |
| H                                                             | 4.057283  | 1.752904  | -2.279669 |
| H                                                             | 4.717914  | 1.013211  | -0.963160 |
| N                                                             | -1.196611 | 2.470293  | 2.665841  |
| H                                                             | -1.710939 | 2.790534  | 3.495769  |
| H                                                             | -1.332028 | 3.203395  | 1.960171  |
| H                                                             | -1.709128 | 1.647990  | 2.323333  |
| N                                                             | 1.326278  | 3.855541  | 4.085774  |
| H                                                             | 1.348896  | 4.678750  | 3.472958  |
| H                                                             | 2.246118  | 3.815831  | 4.542304  |
| H                                                             | 0.658039  | 4.087738  | 4.831021  |
| <b>(<math>\mu</math>-O)(<math>\mu</math>-OAc)<sub>2</sub></b> |           |           |           |
| O                                                             | 1.402580  | 2.819799  | 1.303973  |
| Mn                                                            | 1.030409  | 1.936261  | 2.844433  |
| Mn                                                            | 2.504394  | 2.111038  | 0.048916  |
| O                                                             | 1.615166  | 0.240494  | -0.025939 |
| O                                                             | 0.557474  | 0.113388  | 1.965230  |
| O                                                             | 2.997590  | 1.454651  | 3.339217  |
| O                                                             | 4.057863  | 1.592513  | 1.350669  |
| C                                                             | 0.899240  | -0.379101 | 0.835516  |
| C                                                             | 4.043805  | 1.359532  | 2.608083  |
| C                                                             | 5.329317  | 0.923975  | 3.265037  |
| C                                                             | 0.453827  | -1.781580 | 0.508830  |
| H                                                             | -0.486175 | -2.024501 | 1.016833  |
| H                                                             | 0.358190  | -1.923307 | -0.573476 |

|   |           |           |           |
|---|-----------|-----------|-----------|
| H | 1.222196  | -2.482668 | 0.872337  |
| H | 5.379150  | -0.176276 | 3.235217  |
| H | 6.199850  | 1.312597  | 2.724932  |
| H | 5.357594  | 1.229398  | 4.317118  |
| N | 1.066150  | 2.680782  | -1.632622 |
| N | 3.811658  | 1.228632  | -1.374057 |
| N | 3.594929  | 4.083228  | -0.182965 |
| H | 1.404484  | 3.120916  | -2.494390 |
| H | 0.569181  | 1.829583  | -1.916144 |
| H | 0.359914  | 3.312922  | -1.243509 |
| H | 3.036875  | 4.815773  | 0.266088  |
| H | 4.467236  | 4.010612  | 0.351751  |
| H | 3.849097  | 4.438975  | -1.110136 |
| H | 3.404055  | 0.316671  | -1.613137 |
| H | 4.043433  | 1.705707  | -2.250302 |
| H | 4.690621  | 1.042513  | -0.876005 |
| N | -1.185084 | 2.422116  | 2.656359  |
| H | -1.728501 | 2.731784  | 3.468541  |
| H | -1.294117 | 3.147795  | 1.941313  |
| H | -1.653419 | 1.584350  | 2.294728  |
| N | 1.370374  | 3.815377  | 4.078460  |
| H | 1.425977  | 4.611425  | 3.435851  |
| H | 2.293522  | 3.729564  | 4.517150  |
| H | 0.718056  | 4.087570  | 4.820899  |
| N | 0.633026  | 0.849666  | 4.626255  |
| H | 1.549457  | 0.651981  | 5.046228  |
| H | 0.236450  | -0.051963 | 4.335309  |
| H | 0.029919  | 1.234125  | 5.359462  |

| <b>(<math>\mu</math>-O)(<math>\mu</math>-OAc)<sub>3</sub></b> | <b>IV-IV</b> |           |           |
|---------------------------------------------------------------|--------------|-----------|-----------|
| Mn                                                            | 1.292410     | -2.698143 | -3.312536 |
| Mn                                                            | 3.184624     | -2.397229 | -1.014761 |
| O                                                             | 1.529828     | -2.799240 | -1.547580 |
| O                                                             | 2.928700     | -2.172213 | -4.243598 |
| C                                                             | 4.087984     | -1.892344 | -3.776507 |
| O                                                             | 4.336679     | -1.929086 | -2.519429 |
| C                                                             | 5.184907     | -1.522979 | -4.719537 |
| H                                                             | 4.793869     | -1.343456 | -5.727010 |
| H                                                             | 5.914233     | -2.349913 | -4.756396 |
| H                                                             | 5.716197     | -0.634195 | -4.349085 |
| O                                                             | 2.089852     | -4.495294 | -3.284114 |
| C                                                             | 2.947255     | -4.956710 | -2.429676 |
| O                                                             | 3.551485     | -4.257439 | -1.519260 |
| C                                                             | 3.295167     | -6.407741 | -2.517974 |
| H                                                             | 4.354449     | -6.502686 | -2.810016 |
| H                                                             | 2.666506     | -6.918941 | -3.255251 |
| H                                                             | 3.191687     | -6.879472 | -1.529060 |

|   |           |           |           |
|---|-----------|-----------|-----------|
| O | 2.530994  | -0.550955 | -1.161887 |
| C | 1.619155  | -0.108716 | -1.969794 |
| O | 1.086471  | -0.781148 | -2.941995 |
| C | 1.147710  | 1.295224  | -1.768905 |
| H | 1.937577  | 1.907050  | -1.314996 |
| H | 0.287323  | 1.279341  | -1.076605 |
| H | 0.810480  | 1.729001  | -2.718936 |
| N | 0.628567  | -2.699024 | -5.334482 |
| H | -0.238369 | -2.185059 | -5.540348 |
| H | 1.372745  | -2.245298 | -5.881101 |
| H | 0.521010  | -3.645003 | -5.726774 |
| N | -0.671572 | -3.269343 | -2.902847 |
| H | -0.972201 | -4.106643 | -3.420591 |
| H | -0.754928 | -3.491102 | -1.903140 |
| H | -1.350966 | -2.521486 | -3.101026 |
| N | 2.473296  | -2.786708 | 0.905855  |
| H | 2.417380  | -1.938175 | 1.486499  |
| H | 3.036401  | -3.477388 | 1.420876  |
| H | 1.521074  | -3.166857 | 0.840259  |
| N | 5.012903  | -1.984504 | -0.008265 |
| H | 5.634505  | -1.560388 | -0.709887 |
| H | 5.495716  | -2.828652 | 0.330136  |
| H | 4.968456  | -1.324028 | 0.779148  |

|    | <b>(<math>\mu</math>-O)(<math>\mu</math>-OAc)<sub>3</sub></b> | <b>III-III</b> |           |
|----|---------------------------------------------------------------|----------------|-----------|
| Mn | 1.208873                                                      | -2.744992      | -3.201044 |
| Mn | 3.061672                                                      | -2.448507      | -0.947189 |
| O  | 1.379524                                                      | -2.869124      | -1.417238 |
| O  | 3.069655                                                      | -2.122240      | -4.369652 |
| C  | 4.212103                                                      | -1.839354      | -3.888584 |
| O  | 4.474937                                                      | -1.880194      | -2.644159 |
| C  | 5.328821                                                      | -1.450430      | -4.839007 |
| H  | 4.944842                                                      | -1.253157      | -5.845593 |
| H  | 6.057826                                                      | -2.272913      | -4.890730 |
| H  | 5.859734                                                      | -0.568180      | -4.458048 |
| O  | 2.087850                                                      | -4.588548      | -3.258816 |
| C  | 2.972409                                                      | -5.024960      | -2.441374 |
| O  | 3.532742                                                      | -4.354487      | -1.503075 |
| C  | 3.421765                                                      | -6.459410      | -2.607031 |
| H  | 4.462331                                                      | -6.467388      | -2.963441 |
| H  | 2.790270                                                      | -6.989221      | -3.327340 |
| H  | 3.407246                                                      | -6.971975      | -1.636042 |
| O  | 2.462288                                                      | -0.503513      | -1.125907 |
| C  | 1.595401                                                      | -0.060246      | -1.959057 |
| O  | 1.029331                                                      | -0.732838      | -2.891597 |
| C  | 1.188785                                                      | 1.389633       | -1.817487 |
| H  | 2.005460                                                      | 1.979837       | -1.386813 |

|   |           |           |           |
|---|-----------|-----------|-----------|
| H | 0.327517  | 1.448289  | -1.133784 |
| H | 0.882127  | 1.801009  | -2.785793 |
| N | 0.715438  | -2.699217 | -5.287698 |
| H | 0.009166  | -2.015757 | -5.572772 |
| H | 1.629253  | -2.399779 | -5.660166 |
| H | 0.477313  | -3.602474 | -5.705893 |
| N | -0.971632 | -3.338265 | -2.850068 |
| H | -1.311872 | -4.185464 | -3.312899 |
| H | -0.978363 | -3.518408 | -1.842252 |
| H | -1.652047 | -2.594322 | -3.028391 |
| N | 2.364089  | -2.818061 | 1.200920  |
| H | 2.292003  | -1.974564 | 1.776722  |
| H | 2.865104  | -3.523426 | 1.747834  |
| H | 1.412304  | -3.165771 | 1.054748  |
| N | 4.984507  | -2.012735 | -0.104626 |
| H | 5.484918  | -1.770589 | -0.973308 |
| H | 5.464373  | -2.802762 | 0.334689  |
| H | 5.031497  | -1.212442 | 0.531364  |

|    | <b>(<math>\mu</math>-O)<sub>2</sub>(<math>\mu</math>-OAc)</b> | <b>IV-IV</b> |          |
|----|---------------------------------------------------------------|--------------|----------|
| N  | -3.478636                                                     | 1.510634     | 2.846968 |
| Mn | -2.611872                                                     | -0.054355    | 4.006737 |
| N  | -4.371311                                                     | -0.135402    | 5.136789 |
| O  | -1.172606                                                     | 0.023128     | 2.715856 |
| C  | 0.085827                                                      | 0.037479     | 2.989071 |
| O  | 0.517382                                                      | 0.015938     | 4.202013 |
| Mn | -0.578641                                                     | -0.059176    | 5.793703 |
| O  | -1.730937                                                     | -1.278297    | 5.052969 |
| C  | 1.069126                                                      | 0.059541     | 1.868121 |
| O  | -1.791987                                                     | 1.143206     | 5.127186 |
| N  | -3.397706                                                     | -1.581666    | 2.742985 |
| H  | 2.037840                                                      | 0.448818     | 2.202203 |
| H  | 1.217111                                                      | -0.975528    | 1.512493 |
| H  | 0.682197                                                      | 0.645705     | 1.024451 |
| N  | 0.768221                                                      | -1.589945    | 6.413287 |
| N  | 0.682917                                                      | 1.507785     | 6.499225 |
| N  | -1.477415                                                     | -0.138778    | 7.683073 |
| H  | -4.394664                                                     | -1.583700    | 2.491494 |
| H  | -2.879219                                                     | -1.567540    | 1.854098 |
| H  | -3.203034                                                     | -2.498806    | 3.167897 |
| H  | -3.308277                                                     | 2.407915     | 3.321942 |
| H  | -2.980789                                                     | 1.569999     | 1.948179 |
| H  | -4.480562                                                     | 1.489986     | 2.616953 |
| H  | -4.388028                                                     | -0.981208    | 5.721121 |
| H  | -4.438565                                                     | 0.674285     | 5.766889 |
| H  | -5.247088                                                     | -0.147300    | 4.597387 |
| H  | 1.134631                                                      | -1.598741    | 7.373892 |

|   |           |           |          |
|---|-----------|-----------|----------|
| H | 0.322477  | -2.505834 | 6.264332 |
| H | 1.589934  | -1.573482 | 5.793862 |
| H | -0.833564 | -0.137092 | 8.485213 |
| H | -2.102586 | 0.665697  | 7.821077 |
| H | -2.046992 | -0.989405 | 7.778767 |
| H | 1.501347  | 1.574073  | 5.878829 |
| H | 0.185332  | 2.403922  | 6.404337 |
| H | 1.052973  | 1.481394  | 7.458112 |

| <b>(<math>\mu</math>-O)<sub>2</sub>(<math>\mu</math>-OAc)</b> | <b>III-IV</b> |           |          |
|---------------------------------------------------------------|---------------|-----------|----------|
| N                                                             | -3.464013     | 1.544715  | 2.906603 |
| Mn                                                            | -2.708676     | -0.058033 | 4.101845 |
| N                                                             | -4.797139     | -0.154600 | 5.275963 |
| O                                                             | -1.045079     | 0.031970  | 2.565207 |
| C                                                             | 0.159741      | 0.045096  | 2.908364 |
| O                                                             | 0.555640      | 0.023503  | 4.159857 |
| Mn                                                            | -0.560738     | -0.052012 | 5.730585 |
| O                                                             | -1.704287     | -1.297011 | 5.106012 |
| C                                                             | 1.261995      | 0.061510  | 1.882359 |
| O                                                             | -1.770305     | 1.167393  | 5.184457 |
| N                                                             | -3.381787     | -1.617072 | 2.802183 |
| H                                                             | 2.195321      | 0.463633  | 2.290802 |
| H                                                             | 1.449117      | -0.972978 | 1.553226 |
| H                                                             | 0.945699      | 0.637137  | 1.004408 |
| N                                                             | 0.812037      | -1.603842 | 6.332646 |
| N                                                             | 0.736668      | 1.526216  | 6.423024 |
| N                                                             | -1.452793     | -0.133252 | 7.639957 |
| H                                                             | -4.351136     | -1.640165 | 2.469992 |
| H                                                             | -2.774326     | -1.587978 | 1.974289 |
| H                                                             | -3.199497     | -2.515575 | 3.263394 |
| H                                                             | -3.326806     | 2.418861  | 3.426573 |
| H                                                             | -2.857228     | 1.601894  | 2.079647 |
| H                                                             | -4.433874     | 1.540054  | 2.575124 |
| H                                                             | -4.843667     | -0.993796 | 5.863825 |
| H                                                             | -4.891386     | 0.643129  | 5.913738 |
| H                                                             | -5.663296     | -0.163078 | 4.725869 |
| H                                                             | 1.214888      | -1.652653 | 7.274182 |
| H                                                             | 0.327824      | -2.493252 | 6.163115 |
| H                                                             | 1.595891      | -1.570767 | 5.670563 |
| H                                                             | -0.853309     | -0.138744 | 8.471918 |
| H                                                             | -2.080220     | 0.674177  | 7.718320 |
| H                                                             | -2.031539     | -0.979293 | 7.672153 |
| H                                                             | 1.514848      | 1.572720  | 5.755136 |
| H                                                             | 0.208951      | 2.400087  | 6.312894 |
| H                                                             | 1.145314      | 1.535255  | 7.363281 |

**( $\mu$ -O)<sub>2</sub>( $\mu$ -OAc)**      **III-III**

|    |           |           |          |
|----|-----------|-----------|----------|
| N  | -3.325380 | 1.566349  | 2.863414 |
| Mn | -2.682764 | -0.060348 | 4.118862 |
| N  | -4.825318 | -0.151173 | 5.247367 |
| O  | -1.005561 | 0.031210  | 2.516300 |
| C  | 0.234725  | 0.050361  | 2.816501 |
| O  | 0.690199  | 0.034411  | 4.008257 |
| Mn | -0.682173 | -0.058368 | 5.876971 |
| O  | -1.862221 | -1.323339 | 5.204439 |
| C  | 1.237200  | 0.062408  | 1.671817 |
| O  | -1.931484 | 1.177422  | 5.279690 |
| N  | -3.250153 | -1.631973 | 2.761464 |
| H  | 2.201680  | 0.472002  | 1.993755 |
| H  | 1.401996  | -0.973081 | 1.335344 |
| H  | 0.847331  | 0.628472  | 0.816886 |
| N  | 0.735857  | -1.632167 | 6.261181 |
| N  | 0.647520  | 1.563498  | 6.361548 |
| N  | -1.531119 | -0.154656 | 8.144533 |
| H  | -4.180284 | -1.725850 | 2.347182 |
| H  | -2.557497 | -1.535798 | 2.009332 |
| H  | -3.031610 | -2.495170 | 3.268332 |
| H  | -3.150571 | 2.402585  | 3.429103 |
| H  | -2.624319 | 1.553594  | 2.112992 |
| H  | -4.256422 | 1.643935  | 2.447825 |
| H  | -4.743904 | -0.989901 | 5.828623 |
| H  | -4.781081 | 0.651983  | 5.880594 |
| H  | -5.763320 | -0.159318 | 4.836340 |
| H  | 1.267822  | -1.731268 | 7.128805 |
| H  | 0.202201  | -2.493126 | 6.106769 |
| H  | 1.391309  | -1.534539 | 5.476535 |
| H  | -1.006062 | -0.172222 | 9.023652 |
| H  | -2.163399 | 0.649279  | 8.187339 |
| H  | -2.119521 | -0.992212 | 8.128213 |
| H  | 1.305998  | 1.553581  | 5.573509 |
| H  | 0.068160  | 2.402850  | 6.263320 |
| H  | 1.175002  | 1.633820  | 7.234713 |

|    | <b>(<math>\mu</math>-O)<sub>2</sub>(<math>\mu</math>-OAc)<sub>2</sub></b> | <b>IV-IV</b> |          |
|----|---------------------------------------------------------------------------|--------------|----------|
| Mn | 4.462393                                                                  | 0.547576     | 3.472878 |
| Mn | 2.440582                                                                  | -0.938004    | 4.104687 |
| O  | 5.287689                                                                  | -1.114633    | 2.815668 |
| O  | 3.498129                                                                  | -2.430038    | 3.376273 |
| O  | 3.404864                                                                  | 2.039389     | 4.198607 |
| O  | 1.614722                                                                  | 0.725756     | 4.761270 |
| O  | 2.947915                                                                  | 0.004903     | 2.652107 |
| O  | 3.954232                                                                  | -0.395214    | 4.925778 |
| N  | 5.009621                                                                  | 1.632841     | 1.748721 |
| H  | 5.069133                                                                  | 2.647550     | 1.893496 |



|   |           |           |          |
|---|-----------|-----------|----------|
| H | 4.272020  | 1.478764  | 1.050749 |
| H | 5.889886  | 1.326405  | 1.318193 |
| N | 6.214677  | 1.149568  | 4.483279 |
| H | 6.174378  | 0.735085  | 5.422162 |
| H | 7.084117  | 0.814819  | 4.051706 |
| H | 6.302024  | 2.164158  | 4.613850 |
| N | 0.690242  | -1.543037 | 3.094008 |
| H | -0.183448 | -1.240470 | 3.540429 |
| H | 0.713188  | -1.103363 | 2.166044 |
| H | 0.625855  | -2.555749 | 2.937345 |
| N | 1.893958  | -2.020200 | 5.831589 |
| H | 1.040562  | -1.674511 | 6.286142 |
| H | 2.656049  | -1.904051 | 6.510282 |
| H | 1.781784  | -3.030354 | 5.686420 |
| C | 2.223220  | 1.862147  | 4.691244 |
| C | 4.678810  | -2.252332 | 2.884674 |
| C | 5.398886  | -3.450989 | 2.347077 |
| H | 4.826772  | -4.365526 | 2.532664 |
| H | 5.552525  | -3.324617 | 1.264670 |
| H | 6.392738  | -3.524337 | 2.810840 |
| C | 1.514570  | 3.068609  | 5.226451 |
| H | 1.515661  | 3.865860  | 4.470055 |
| H | 0.488270  | 2.821529  | 5.516013 |
| H | 2.062243  | 3.448803  | 6.102301 |

|    | <b>(<math>\mu</math>-O)<sub>2</sub>(<math>\mu</math>-OAc)<sub>2</sub></b> | <b>III-IV</b> |          |
|----|---------------------------------------------------------------------------|---------------|----------|
| Mn | 4.637407                                                                  | 0.674933      | 3.420685 |
| Mn | 2.588536                                                                  | -0.828714     | 4.061039 |
| O  | 5.395218                                                                  | -1.395607     | 2.711608 |
| O  | 3.472397                                                                  | -2.436796     | 3.379846 |
| O  | 3.215386                                                                  | 2.261544      | 4.336058 |
| O  | 1.600547                                                                  | 0.702853      | 4.772870 |
| O  | 3.072533                                                                  | 0.107596      | 2.605862 |
| O  | 4.091901                                                                  | -0.305323     | 4.896231 |
| N  | 5.114543                                                                  | 1.734949      | 1.646667 |
| H  | 5.172176                                                                  | 2.753794      | 1.737374 |
| H  | 4.307353                                                                  | 1.527314      | 1.048142 |
| H  | 5.951231                                                                  | 1.411708      | 1.151489 |
| N  | 6.372175                                                                  | 1.232612      | 4.505700 |
| H  | 6.220840                                                                  | 0.762210      | 5.405032 |
| H  | 7.260405                                                                  | 0.888722      | 4.128240 |
| H  | 6.474737                                                                  | 2.233450      | 4.699093 |
| N  | 0.822902                                                                  | -1.424615     | 3.027223 |
| H  | -0.049130                                                                 | -1.090260     | 3.446482 |
| H  | 0.929518                                                                  | -0.961080     | 2.119013 |
| H  | 0.750007                                                                  | -2.431269     | 2.855897 |
| N  | 2.053229                                                                  | -1.922302     | 5.808604 |

|   |          |           |          |
|---|----------|-----------|----------|
| H | 1.200564 | -1.592298 | 6.269202 |
| H | 2.839484 | -1.737820 | 6.440094 |
| H | 1.993124 | -2.935453 | 5.674722 |
| C | 2.089244 | 1.920089  | 4.771277 |
| C | 4.672377 | -2.411887 | 2.851418 |
| C | 5.186919 | -3.757332 | 2.381038 |
| H | 4.469490 | -4.560470 | 2.579081 |
| H | 5.395446 | -3.705500 | 1.303108 |
| H | 6.138508 | -3.975904 | 2.885261 |
| C | 1.172499 | 2.973188  | 5.360234 |
| H | 0.995225 | 3.756574  | 4.610240 |
| H | 0.217136 | 2.547809  | 5.684654 |
| H | 1.674343 | 3.449620  | 6.214184 |

| <b>(<math>\mu</math>-O)<sub>2</sub>(<math>\mu</math>-OAc)<sub>2</sub></b> | <b>III-III</b> |           |          |
|---------------------------------------------------------------------------|----------------|-----------|----------|
| Mn                                                                        | 4.473495       | 0.554760  | 3.469623 |
| Mn                                                                        | 2.424945       | -0.950068 | 4.109805 |
| O                                                                         | 5.450837       | -1.391034 | 2.692895 |
| O                                                                         | 3.661878       | -2.707944 | 3.253882 |
| O                                                                         | 3.239965       | 2.313589  | 4.322572 |
| O                                                                         | 1.449273       | 1.000027  | 4.885775 |
| O                                                                         | 2.928149       | 0.009610  | 2.617594 |
| O                                                                         | 3.969730       | -0.405366 | 4.962207 |
| N                                                                         | 4.904708       | 1.610783  | 1.662439 |
| H                                                                         | 4.897220       | 2.631265  | 1.719860 |
| H                                                                         | 4.052450       | 1.301355  | 1.179454 |
| H                                                                         | 5.717866       | 1.299399  | 1.127260 |
| N                                                                         | 6.206156       | 1.086034  | 4.602941 |
| H                                                                         | 5.920120       | 0.559507  | 5.437559 |
| H                                                                         | 7.098946       | 0.715264  | 4.270988 |
| H                                                                         | 6.311724       | 2.070880  | 4.854983 |
| N                                                                         | 0.697764       | -1.490831 | 2.972241 |
| H                                                                         | -0.205483      | -1.147376 | 3.305081 |
| H                                                                         | 0.973848       | -0.947698 | 2.144920 |
| H                                                                         | 0.618108       | -2.474750 | 2.706976 |
| N                                                                         | 1.987139       | -1.993568 | 5.922923 |
| H                                                                         | 1.192416       | -1.643264 | 6.462001 |
| H                                                                         | 2.854924       | -1.709529 | 6.393797 |
| H                                                                         | 1.954071       | -3.014165 | 5.880264 |
| C                                                                         | 2.074656       | 2.108449  | 4.801386 |
| C                                                                         | 4.825994       | -2.501006 | 2.775521 |
| C                                                                         | 5.571791       | -3.724036 | 2.221302 |
| H                                                                         | 5.012114       | -4.650255 | 2.400955 |
| H                                                                         | 5.726308       | -3.596942 | 1.139070 |
| H                                                                         | 6.567426       | -3.794613 | 2.682971 |
| C                                                                         | 1.354865       | 3.349974  | 5.348792 |
| H                                                                         | 1.362684       | 4.150360  | 4.594862 |

|   |          |          |          |
|---|----------|----------|----------|
| H | 0.322017 | 3.119443 | 5.637790 |
| H | 1.900166 | 3.728082 | 6.226982 |

**( $\mu$ -OAc)<sub>2</sub> IV-IV**

|    |           |           |           |
|----|-----------|-----------|-----------|
| Mn | 0.757073  | 0.329076  | 3.479564  |
| Mn | 0.871131  | 0.294557  | -1.557195 |
| N  | 0.794812  | -1.775652 | 3.676876  |
| N  | -0.835514 | 0.307702  | 4.879208  |
| N  | 0.760439  | 2.436405  | 3.652876  |
| N  | 2.147639  | 0.367204  | 5.062871  |
| N  | -0.522005 | 0.269588  | -3.138429 |
| N  | 2.461909  | 0.300902  | -2.957900 |
| N  | 0.850097  | -1.812755 | -1.729330 |
| N  | 0.849290  | 2.399422  | -1.757342 |
| H  | 1.065628  | 2.762096  | -2.704247 |
| H  | -0.073906 | 2.800474  | -1.517394 |
| H  | 1.536073  | 2.857496  | -1.136277 |
| H  | 1.034016  | -2.188755 | -2.677810 |
| H  | 1.558581  | -2.259586 | -1.124343 |
| H  | -0.063513 | -2.213315 | -1.455052 |
| H  | 2.184896  | 0.402310  | -3.952606 |
| H  | 3.131236  | 1.070917  | -2.779507 |
| H  | 3.034441  | -0.561666 | -2.923234 |
| H  | -0.397204 | -0.485189 | -3.838415 |
| H  | -1.468004 | 0.135238  | -2.737333 |
| H  | -0.575635 | 1.141819  | -3.696154 |
| H  | 0.583529  | -2.141691 | 4.623664  |
| H  | 0.109848  | -2.237832 | 3.056755  |
| H  | 1.720297  | -2.169865 | 3.434297  |
| H  | 0.572436  | 2.808891  | 4.601867  |
| H  | 1.671134  | 2.844654  | 3.380262  |
| H  | 0.048762  | 2.877507  | 3.047637  |
| H  | 2.211808  | -0.506599 | 5.617018  |
| H  | 3.092884  | 0.515336  | 4.664695  |
| H  | 2.012223  | 1.117438  | 5.765797  |
| H  | -0.559544 | 0.201602  | 5.873721  |
| H  | -1.412501 | 1.167369  | 4.848443  |
| H  | -1.500565 | -0.464842 | 4.695634  |
| O  | -0.670925 | 0.308655  | -0.331241 |
| C  | -1.165203 | 0.334360  | 0.873189  |
| O  | -0.416346 | 0.321717  | 1.939059  |
| C  | -2.651497 | 0.361609  | 0.994587  |
| H  | -3.048950 | -0.664205 | 0.827296  |
| H  | -3.112960 | 0.987347  | 0.212148  |
| H  | -2.984782 | 0.694059  | 1.986198  |
| O  | 2.040409  | 0.298237  | -0.013144 |
| C  | 2.792994  | 0.298993  | 1.049996  |

|   |          |           |           |
|---|----------|-----------|-----------|
| O | 2.300571 | 0.325748  | 2.255070  |
| C | 4.279230 | 0.284431  | 0.925656  |
| H | 4.612885 | -0.087441 | -0.052159 |
| H | 4.751689 | -0.299038 | 1.732943  |
| H | 4.663170 | 1.322492  | 1.042842  |

**( $\mu$ -OAc)<sub>2</sub> III-III**

|    |           |           |           |
|----|-----------|-----------|-----------|
| Mn | 0.909492  | 0.332913  | 3.580108  |
| Mn | 0.717377  | 0.294218  | -1.658221 |
| N  | 0.923302  | -1.779965 | 3.636406  |
| N  | -0.806025 | 0.321989  | 4.829326  |
| N  | 0.907798  | 2.445803  | 3.604686  |
| N  | 2.342116  | 0.360410  | 5.458481  |
| N  | -0.715433 | 0.266508  | -3.536400 |
| N  | 2.432865  | 0.300990  | -2.907597 |
| N  | 0.716443  | -1.818697 | -1.680464 |
| N  | 0.706063  | 2.407177  | -1.717333 |
| H  | 0.963456  | 2.831512  | -2.619313 |
| H  | -0.242043 | 2.747007  | -1.508244 |
| H  | 1.331685  | 2.825722  | -1.017400 |
| H  | 0.931058  | -2.252718 | -2.589053 |
| H  | 1.377621  | -2.225274 | -1.006441 |
| H  | -0.218533 | -2.161059 | -1.422763 |
| H  | 2.218906  | 0.428420  | -3.907432 |
| H  | 3.096064  | 1.049154  | -2.662938 |
| H  | 2.986235  | -0.565118 | -2.853873 |
| H  | -0.633953 | -0.519063 | -4.196509 |
| H  | -1.677482 | 0.204018  | -3.177192 |
| H  | -0.722618 | 1.096883  | -4.144572 |
| H  | 0.665407  | -2.206070 | 4.537404  |
| H  | 0.298740  | -2.197810 | 2.935116  |
| H  | 1.871943  | -2.118515 | 3.427669  |
| H  | 0.693846  | 2.878405  | 4.514109  |
| H  | 1.842097  | 2.789522  | 3.346332  |
| H  | 0.245398  | 2.852653  | 2.932019  |
| H  | 2.352238  | -0.471863 | 6.064006  |
| H  | 3.303972  | 0.427444  | 5.099576  |
| H  | 2.257717  | 1.143598  | 6.121049  |
| H  | -0.592406 | 0.187686  | 5.828333  |
| H  | -1.357774 | 1.189466  | 4.781356  |
| H  | -1.470553 | -0.423320 | 4.579595  |
| O  | -0.804991 | 0.305796  | -0.533137 |
| C  | -1.245979 | 0.321167  | 0.721378  |
| O  | -0.500744 | 0.311407  | 1.724406  |
| C  | -2.749797 | 0.329038  | 0.819846  |
| H  | -3.132184 | -0.685838 | 0.618331  |
| H  | -3.200872 | 0.988188  | 0.066973  |

|   |           |           |          |
|---|-----------|-----------|----------|
| H | -3.075894 | 0.628874  | 1.821528 |
| O | 2.127426  | 0.314464  | 0.197329 |
| C | 2.872741  | 0.309456  | 1.200338 |
| O | 2.431742  | 0.324843  | 2.454839 |
| C | 4.376576  | 0.306922  | 1.101772 |
| H | 4.703678  | 0.005061  | 0.101018 |
| H | 4.830227  | -0.348083 | 1.856690 |
| H | 4.755127  | 1.323902  | 1.299920 |

| <b>(<math>\mu</math>-OAc)<sub>3</sub></b> | <b>IV-IV</b> |           |           |
|-------------------------------------------|--------------|-----------|-----------|
| Mn                                        | 0.744623     | 0.150504  | 3.573147  |
| Mn                                        | 0.166339     | -2.000939 | -0.105468 |
| N                                         | 2.242589     | -0.209913 | 4.996601  |
| N                                         | -0.634468    | 0.320776  | 5.144684  |
| N                                         | 1.132453     | 2.203314  | 3.765503  |
| N                                         | -1.585219    | -2.993000 | -0.697225 |
| N                                         | 1.265867     | -3.662157 | -0.759971 |
| N                                         | 0.310173     | -1.206474 | -2.041714 |
| H                                         | -1.509995    | -3.652680 | -1.489610 |
| H                                         | -1.954609    | -3.544101 | 0.094603  |
| H                                         | -2.323208    | -2.316134 | -0.952531 |
| H                                         | 1.294780     | -1.010938 | -2.287215 |
| H                                         | -0.075201    | -1.773928 | -2.815138 |
| H                                         | -0.186698    | -0.301632 | -2.080857 |
| H                                         | 1.172584     | -3.927269 | -1.754832 |
| H                                         | 2.273297     | -3.492561 | -0.606532 |
| H                                         | 1.023786     | -4.503991 | -0.211548 |
| H                                         | 1.451185     | 2.538921  | 4.689812  |
| H                                         | 1.868522     | 2.480048  | 3.095475  |
| H                                         | 0.295308     | 2.760729  | 3.528185  |
| H                                         | 2.136373     | 0.243265  | 5.919602  |
| H                                         | 2.301806     | -1.223896 | 5.185405  |
| H                                         | 3.168557     | 0.076429  | 4.638363  |
| H                                         | -0.435060    | 1.024231  | 5.875426  |
| H                                         | -1.563692    | 0.564366  | 4.764459  |
| H                                         | -0.745318    | -0.582339 | 5.634443  |
| O                                         | 1.826233     | -1.121409 | 0.297206  |
| C                                         | 2.525774     | -0.364436 | 1.077305  |
| O                                         | 2.104576     | 0.072910  | 2.219122  |
| C                                         | 3.889077     | 0.039769  | 0.627839  |
| H                                         | 4.325906     | -0.699304 | -0.058928 |
| H                                         | 4.561254     | 0.216958  | 1.479839  |
| H                                         | 3.806714     | 0.997820  | 0.072344  |
| O                                         | 0.385148     | -1.737881 | 3.553290  |
| C                                         | 0.120955     | -2.817264 | 2.892468  |
| O                                         | 0.023174     | -2.863062 | 1.603949  |
| C                                         | -0.065927    | -4.083148 | 3.658297  |

|   |           |           |           |
|---|-----------|-----------|-----------|
| H | 0.919216  | -4.588064 | 3.747640  |
| H | -0.738228 | -4.778265 | 3.134599  |
| H | -0.427984 | -3.891763 | 4.678344  |
| O | -0.932815 | -0.503395 | 0.375993  |
| C | -1.280253 | 0.401949  | 1.231153  |
| O | -0.672056 | 0.596656  | 2.355316  |
| C | -2.457786 | 1.258788  | 0.911216  |
| H | -3.370260 | 0.762906  | 1.304996  |
| H | -2.594484 | 1.372763  | -0.173906 |
| H | -2.388637 | 2.242958  | 1.396128  |

| <b>(<math>\mu</math>-OAc)<sub>3</sub></b> | <b>III-IV</b> |           |           |
|-------------------------------------------|---------------|-----------|-----------|
| N                                         | 2.254922      | -0.162805 | 5.004898  |
| N                                         | -0.620349     | 0.380994  | 5.158214  |
| N                                         | 1.208844      | 2.538823  | 3.742353  |
| H                                         | -1.524717     | -3.579505 | -1.544191 |
| H                                         | 1.199268      | -3.882595 | -1.773237 |
| H                                         | 1.422111      | 2.943054  | 4.664828  |
| H                                         | 2.012370      | 2.797217  | 3.153998  |
| H                                         | 0.425296      | 3.102381  | 3.385810  |
| H                                         | 2.246992      | 0.383649  | 5.877775  |
| H                                         | -0.360612     | 0.957215  | 5.971472  |
| O                                         | 2.142890      | 0.125980  | 2.195807  |
| H                                         | 4.303222      | -0.843212 | -0.068306 |
| H                                         | 4.614089      | 0.071917  | 1.453130  |
| O                                         | 0.384937      | -1.894177 | 3.469016  |
| C                                         | 0.110874      | -2.950156 | 2.870965  |
| O                                         | -0.704649     | 0.652729  | 2.362141  |
| Mn                                        | 0.775560      | 0.295827  | 3.593773  |
| Mn                                        | 0.166523      | -2.033826 | -0.032535 |
| N                                         | -1.584397     | -2.993649 | -0.699050 |
| N                                         | 1.270949      | -3.662309 | -0.769546 |
| N                                         | 0.330701      | -1.131184 | -1.965789 |
| H                                         | -1.922340     | -3.606218 | 0.057189  |
| H                                         | -2.324523     | -2.298368 | -0.871201 |
| H                                         | 1.314540      | -0.924581 | -2.188797 |
| H                                         | -0.047277     | -1.643406 | -2.775594 |
| H                                         | -0.158987     | -0.225616 | -1.953992 |
| H                                         | 2.268248      | -3.485600 | -0.581617 |
| H                                         | 1.021998      | -4.519108 | -0.254339 |
| H                                         | 2.205766      | -1.154881 | 5.279259  |
| H                                         | 3.184863      | -0.017257 | 4.586713  |
| H                                         | -1.501523     | 0.777337  | 4.801013  |
| H                                         | -0.845124     | -0.556672 | 5.521171  |
| O                                         | 1.835995      | -1.203380 | 0.370114  |
| C                                         | 2.544797      | -0.401585 | 1.113024  |
| C                                         | 3.920719      | -0.076407 | 0.614986  |

|   |           |           |           |
|---|-----------|-----------|-----------|
| H | 3.871848  | 0.879419  | 0.060822  |
| O | -0.014295 | -3.028195 | 1.543370  |
| C | -0.088481 | -4.259203 | 3.579059  |
| H | 0.891206  | -4.764995 | 3.655532  |
| H | -0.764644 | -4.929563 | 3.036004  |
| H | -0.455416 | -4.085714 | 4.598433  |
| O | -0.948351 | -0.564851 | 0.452080  |
| C | -1.312023 | 0.368886  | 1.282726  |
| C | -2.544311 | 1.142989  | 0.924270  |
| H | -3.410860 | 0.667572  | 1.420409  |
| H | -2.732549 | 1.138187  | -0.155612 |
| H | -2.478095 | 2.173105  | 1.298060  |

| <b>(<math>\mu</math>-OAc)<sub>3</sub></b> | <b>III-III</b> |           |           |
|-------------------------------------------|----------------|-----------|-----------|
| Mn                                        | 0.742655       | 0.146371  | 3.567383  |
| Mn                                        | 0.168099       | -1.997304 | -0.096480 |
| N                                         | 2.318652       | -0.269330 | 5.034714  |
| N                                         | -0.732312      | 0.304712  | 5.185137  |
| N                                         | 1.153929       | 2.297856  | 3.723373  |
| N                                         | -1.679011      | -3.030278 | -0.673191 |
| N                                         | 1.349139       | -3.725831 | -0.755778 |
| N                                         | 0.315789       | -1.123439 | -2.102881 |
| H                                         | -1.687096      | -3.584231 | -1.537621 |
| H                                         | -1.944612      | -3.672304 | 0.083254  |
| H                                         | -2.441781      | -2.347810 | -0.758286 |
| H                                         | 1.273006       | -0.786173 | -2.260396 |
| H                                         | 0.075189       | -1.704202 | -2.914667 |
| H                                         | -0.295340      | -0.299098 | -2.146443 |
| H                                         | 1.180945       | -4.113892 | -1.691347 |
| H                                         | 2.344319       | -3.473871 | -0.722796 |
| H                                         | 1.222235       | -4.500232 | -0.093165 |
| H                                         | 1.325369       | 2.703979  | 4.650629  |
| H                                         | 1.981785       | 2.514674  | 3.155298  |
| H                                         | 0.373835       | 2.826942  | 3.315689  |
| H                                         | 2.344883       | 0.279824  | 5.901812  |
| H                                         | 2.251066       | -1.254411 | 5.317773  |
| H                                         | 3.238198       | -0.155116 | 4.591883  |
| H                                         | -0.507105      | 0.877454  | 6.006946  |
| H                                         | -1.603479      | 0.685877  | 4.796754  |
| H                                         | -0.956334      | -0.633114 | 5.538660  |
| O                                         | 1.931616       | -1.109331 | 0.278123  |
| C                                         | 2.599674       | -0.345150 | 1.055084  |
| O                                         | 2.193624       | 0.119409  | 2.173868  |
| C                                         | 3.980027       | 0.065868  | 0.596234  |
| H                                         | 4.421919       | -0.694450 | -0.056663 |
| H                                         | 4.635371       | 0.270485  | 1.449664  |
| H                                         | 3.885405       | 0.997787  | 0.014302  |

|   |           |           |           |
|---|-----------|-----------|-----------|
| O | 0.394316  | -1.836046 | 3.602151  |
| C | 0.110473  | -2.886836 | 2.933451  |
| O | -0.008829 | -2.952895 | 1.662314  |
| C | -0.074424 | -4.170945 | 3.709263  |
| H | 0.904559  | -4.673581 | 3.780092  |
| H | -0.762175 | -4.848791 | 3.192166  |
| H | -0.422541 | -3.970714 | 4.728162  |
| O | -1.004224 | -0.425567 | 0.349266  |
| C | -1.341593 | 0.452056  | 1.214855  |
| O | -0.771680 | 0.645091  | 2.342183  |
| C | -2.535702 | 1.319471  | 0.888551  |
| H | -3.440280 | 0.816103  | 1.268605  |
| H | -2.649890 | 1.443044  | -0.193743 |
| H | -2.463297 | 2.294055  | 1.383100  |

**( $\mu$ -OAc)<sub>4</sub> IV-IV**

|    |           |           |           |
|----|-----------|-----------|-----------|
| Mn | 1.253275  | -1.005300 | -0.724411 |
| O  | 2.450884  | 0.005476  | -1.754804 |
| C  | 2.198872  | 1.240057  | -2.092955 |
| O  | 1.117454  | 1.832796  | -1.744456 |
| C  | 3.216917  | 1.938385  | -2.924725 |
| H  | 3.167816  | 3.026796  | -2.791925 |
| H  | 3.014626  | 1.711132  | -3.989616 |
| H  | 4.226635  | 1.563776  | -2.702589 |
| O  | -1.346503 | 0.229706  | 0.183956  |
| C  | -1.216447 | -0.981722 | 0.581547  |
| O  | -0.161977 | -1.694873 | 0.295111  |
| C  | -2.267696 | -1.628681 | 1.413419  |
| H  | -2.008028 | -1.482346 | 2.480264  |
| H  | -2.295069 | -2.713400 | 1.235058  |
| H  | -3.253899 | -1.180223 | 1.237152  |
| O  | 0.239220  | 2.348003  | 0.757086  |
| C  | 1.145739  | 1.557040  | 1.262474  |
| O  | 1.446228  | 0.434535  | 0.721870  |
| C  | 1.839037  | 2.020669  | 2.495325  |
| H  | 2.239910  | 1.179147  | 3.074461  |
| H  | 1.167432  | 2.634704  | 3.113011  |
| H  | 2.685867  | 2.669262  | 2.196871  |
| O  | -0.124499 | -0.699935 | -2.210284 |
| C  | -1.032621 | -0.016286 | -2.802430 |
| O  | -1.426973 | 1.144505  | -2.355632 |
| C  | -1.672029 | -0.515268 | -4.050587 |
| H  | -2.709801 | -0.159377 | -4.126612 |
| H  | -1.629980 | -1.609958 | -4.115815 |
| H  | -1.123030 | -0.095963 | -4.916331 |
| Mn | -0.701452 | 1.907093  | -0.803287 |
| N  | 2.728178  | -1.854738 | 0.457588  |



|   |           |           |           |
|---|-----------|-----------|-----------|
| H | 3.625279  | -1.998307 | -0.032220 |
| H | 2.897931  | -1.182527 | 1.219779  |
| H | 2.447768  | -2.748962 | 0.890260  |
| N | 1.518078  | -2.733151 | -1.835859 |
| H | 2.468274  | -2.836959 | -2.225310 |
| H | 1.281523  | -3.596818 | -1.322452 |
| H | 0.866136  | -2.658570 | -2.630307 |
| N | -2.522258 | 2.576176  | -0.076048 |
| H | -3.223835 | 2.721895  | -0.819282 |
| H | -2.466325 | 3.437041  | 0.490307  |
| H | -2.874274 | 1.826074  | 0.536491  |
| N | -0.615894 | 3.816418  | -1.603039 |
| H | 0.226741  | 3.836346  | -2.195646 |
| H | -1.419662 | 4.066064  | -2.200243 |
| H | -0.505210 | 4.550151  | -0.885127 |

**( $\mu$ -OAc)<sub>4</sub> III-III**

|    |           |           |           |
|----|-----------|-----------|-----------|
| Mn | 1.226918  | -0.970315 | -0.724068 |
| O  | 2.528657  | -0.056554 | -1.764516 |
| C  | 2.309153  | 1.175621  | -2.126840 |
| O  | 1.265425  | 1.815604  | -1.815686 |
| C  | 3.370522  | 1.811396  | -2.978130 |
| H  | 3.372645  | 2.899014  | -2.844189 |
| H  | 3.146466  | 1.595787  | -4.035328 |
| H  | 4.358460  | 1.392774  | -2.754648 |
| O  | -1.395223 | 0.086100  | 0.264552  |
| C  | -1.203898 | -1.109405 | 0.624658  |
| O  | -0.136985 | -1.789860 | 0.312950  |
| C  | -2.212587 | -1.822785 | 1.478302  |
| H  | -1.952370 | -1.659640 | 2.536651  |
| H  | -2.192363 | -2.902758 | 1.292481  |
| H  | -3.217310 | -1.420356 | 1.306946  |
| O  | 0.197582  | 2.434544  | 0.786198  |
| C  | 1.111230  | 1.673586  | 1.319676  |
| O  | 1.451943  | 0.556319  | 0.838835  |
| C  | 1.777747  | 2.212567  | 2.552710  |
| H  | 2.162421  | 1.395578  | 3.173260  |
| H  | 1.090029  | 2.843461  | 3.127688  |
| H  | 2.628592  | 2.841097  | 2.243860  |
| O  | -0.233221 | -0.667094 | -2.335507 |
| C  | -1.122124 | 0.055714  | -2.867694 |
| O  | -1.494926 | 1.206833  | -2.383772 |
| C  | -1.798503 | -0.372126 | -4.138450 |
| H  | -2.821281 | 0.018770  | -4.189978 |
| H  | -1.797722 | -1.464088 | -4.228564 |
| H  | -1.238185 | 0.044894  | -4.990772 |
| Mn | -0.679697 | 1.867842  | -0.800675 |

|   |           |           |           |
|---|-----------|-----------|-----------|
| N | 2.805518  | -1.826092 | 0.586230  |
| H | 3.711098  | -1.966395 | 0.127079  |
| H | 2.943506  | -1.128584 | 1.324841  |
| H | 2.546446  | -2.706497 | 1.042736  |
| N | 1.460795  | -2.804665 | -1.957259 |
| H | 2.390733  | -2.924178 | -2.371455 |
| H | 1.219722  | -3.675326 | -1.473053 |
| H | 0.795860  | -2.691623 | -2.729453 |
| N | -2.646142 | 2.523452  | 0.004913  |
| H | -3.352807 | 2.707922  | -0.714376 |
| H | -2.610359 | 3.339201  | 0.624411  |
| H | -2.981022 | 1.731111  | 0.562782  |
| N | -0.526559 | 3.903797  | -1.677496 |
| H | 0.346451  | 3.899314  | -2.214960 |
| H | -1.281839 | 4.153698  | -2.323718 |
| H | -0.450440 | 4.652227  | -0.981133 |

| <b>(<math>\mu</math>-O)(<math>\mu</math>-OH)</b> | <b>IV-IV</b> |           |           |
|--------------------------------------------------|--------------|-----------|-----------|
| O                                                | 1.110375     | 0.010702  | 1.494131  |
| Mn                                               | 0.008206     | -0.015273 | 3.001922  |
| O                                                | -1.226423    | -0.037699 | 1.417165  |
| Mn                                               | 0.115373     | -0.005906 | -0.079889 |
| N                                                | 0.064034     | -2.107788 | 3.288550  |
| N                                                | -1.512764    | -0.060078 | 4.531835  |
| N                                                | -0.033216    | 2.077469  | 3.294476  |
| N                                                | 1.660120     | 0.035319  | 4.308551  |
| N                                                | -1.324136    | -0.031326 | -1.696012 |
| N                                                | 1.858120     | 0.022274  | -1.258868 |
| N                                                | 0.187154     | -2.096014 | -0.399483 |
| N                                                | 0.090465     | 2.084486  | -0.392558 |
| H                                                | 0.171028     | 2.347141  | -1.391956 |
| H                                                | -0.782242    | 2.538716  | -0.076680 |
| H                                                | 0.867901     | 2.580288  | 0.072600  |
| H                                                | 0.284832     | -2.352887 | -1.398683 |
| H                                                | 0.984572     | -2.557736 | 0.066638  |
| H                                                | -0.665519    | -2.589747 | -0.088214 |
| H                                                | 1.728148     | -0.148231 | -2.273448 |
| H                                                | 2.376791     | 0.915878  | -1.194731 |
| H                                                | 2.536433     | -0.689735 | -0.934387 |
| H                                                | -1.922096    | -0.876141 | -1.720475 |
| H                                                | -2.001796    | 0.751077  | -1.668439 |
| H                                                | -0.918354    | 0.019702  | -2.648820 |
| H                                                | -0.000648    | -2.394365 | 4.282152  |
| H                                                | -0.717133    | -2.603869 | 2.829865  |
| H                                                | 0.937643     | -2.539299 | 2.944796  |
| H                                                | -0.116612    | 2.360772  | 4.287474  |
| H                                                | 0.821410     | 2.550736  | 2.958047  |

|   |           |           |          |
|---|-----------|-----------|----------|
| H | -0.834158 | 2.536453  | 2.831397 |
| H | 1.857158  | -0.846806 | 4.813608 |
| H | 2.512906  | 0.230182  | 3.752271 |
| H | 1.631280  | 0.757669  | 5.050597 |
| H | -1.148600 | -0.087525 | 5.502548 |
| H | -2.153366 | 0.753398  | 4.521104 |
| H | -2.147467 | -0.876192 | 4.473108 |
| H | -2.209141 | -0.065348 | 1.385266 |

| <b>(<math>\mu</math>-OH)<sub>2</sub></b> | <b>IV-IV</b> |           |           |
|------------------------------------------|--------------|-----------|-----------|
| O                                        | 1.247533     | 0.039497  | 1.496932  |
| Mn                                       | 0.039801     | 0.015179  | 3.179745  |
| O                                        | -1.047726    | -0.015198 | 1.419991  |
| Mn                                       | 0.160733     | 0.004206  | -0.262743 |
| N                                        | 0.088454     | -2.095505 | 3.521301  |
| N                                        | -1.604480    | -0.025058 | 4.535577  |
| N                                        | -0.031267    | 2.128319  | 3.502282  |
| N                                        | 1.589142     | 0.066999  | 4.644228  |
| N                                        | -1.387269    | -0.034843 | -1.728391 |
| N                                        | 1.806173     | 0.034391  | -1.617858 |
| N                                        | 0.217928     | -2.108679 | -0.585124 |
| N                                        | 0.125960     | 2.115076  | -0.602419 |
| H                                        | 0.153856     | 2.387202  | -1.606832 |
| H                                        | -0.725922    | 2.577447  | -0.233927 |
| H                                        | 0.929970     | 2.613680  | -0.177887 |
| H                                        | 0.258374     | -2.386980 | -1.587426 |
| H                                        | 1.042261     | -2.569390 | -0.156756 |
| H                                        | -0.613467    | -2.604730 | -0.213607 |
| H                                        | 1.533979     | 0.022395  | -2.624123 |
| H                                        | 2.409356     | 0.875680  | -1.512589 |
| H                                        | 2.447068     | -0.777256 | -1.503100 |
| H                                        | -1.996519    | -0.875555 | -1.659864 |
| H                                        | -2.034618    | 0.777165  | -1.662908 |
| H                                        | -1.046795    | -0.028829 | -2.713695 |
| H                                        | 0.063574     | -2.365516 | 4.526342  |
| H                                        | -0.712988    | -2.600212 | 3.099077  |
| H                                        | 0.942696     | -2.553235 | 3.152522  |
| H                                        | -0.071950    | 2.407232  | 4.504382  |
| H                                        | 0.795539     | 2.630364  | 3.128663  |
| H                                        | -0.860020    | 2.581800  | 3.074704  |
| H                                        | 2.237227     | -0.744932 | 4.585696  |
| H                                        | 2.197451     | 0.907705  | 4.567808  |
| H                                        | 1.248682     | 0.069101  | 5.629520  |
| H                                        | -1.332410    | -0.010779 | 5.541879  |
| H                                        | -2.250118    | 0.782705  | 4.420212  |
| H                                        | -2.202937    | -0.869891 | 4.431364  |
| H                                        | -2.034084    | -0.045980 | 1.386017  |

H 2.234200 0.057814 1.530676

| <b>(<math>\mu</math>-O)<sub>2</sub>(<math>\mu</math>-OH)</b> | <b>IV-IV</b> |           |           |
|--------------------------------------------------------------|--------------|-----------|-----------|
| O                                                            | 1.129001     | -0.113212 | 1.295481  |
| Mn                                                           | 0.020068     | -0.074980 | 2.763074  |
| O                                                            | -0.326952    | -1.805477 | 2.277441  |
| Mn                                                           | -0.091468    | -1.264286 | 0.543524  |
| O                                                            | -1.352981    | 0.147483  | 1.282564  |
| N                                                            | 1.486166     | -0.604872 | 4.118307  |
| N                                                            | -1.520835    | -0.137013 | 4.206939  |
| N                                                            | 0.359195     | 1.999174  | 3.088702  |
| N                                                            | -1.735164    | -2.434835 | -0.082442 |
| N                                                            | 1.287282     | -2.743476 | 0.122095  |
| N                                                            | 0.133654     | -0.399746 | -1.386386 |
| H                                                            | -1.769041    | -2.794665 | -1.046029 |
| H                                                            | -1.848535    | -3.249670 | 0.537283  |
| H                                                            | -2.588415    | -1.871894 | 0.046643  |
| H                                                            | 0.890485     | 0.298634  | -1.352022 |
| H                                                            | 0.384368     | -1.042607 | -2.150778 |
| H                                                            | -0.700799    | 0.101136  | -1.723964 |
| H                                                            | 1.159116     | -3.277324 | -0.748987 |
| H                                                            | 2.235601     | -2.341691 | 0.090063  |
| H                                                            | 1.286640     | -3.431631 | 0.888493  |
| H                                                            | 0.699877     | 2.267099  | 4.022805  |
| H                                                            | 1.077813     | 2.326985  | 2.427028  |
| H                                                            | -0.467828    | 2.591866  | 2.927747  |
| H                                                            | 1.448542     | -0.171413 | 5.051514  |
| H                                                            | 1.452410     | -1.623355 | 4.268169  |
| H                                                            | 2.417282     | -0.396897 | 3.729028  |
| H                                                            | -1.467989    | 0.467694  | 5.037974  |
| H                                                            | -2.403906    | 0.099697  | 3.731799  |
| H                                                            | -1.645741    | -1.098939 | 4.553297  |
| H                                                            | -1.307818    | 1.009781  | 0.818108  |

| <b>(<math>\mu</math>-O)(<math>\mu</math>-OH)<sub>2</sub></b> | <b>IV-IV</b> |           |           |
|--------------------------------------------------------------|--------------|-----------|-----------|
| O                                                            | 1.310656     | -0.039816 | 1.244967  |
| Mn                                                           | 0.059637     | -0.061246 | 2.829551  |
| O                                                            | -0.176820    | -1.781869 | 2.252726  |
| Mn                                                           | -0.058658    | -1.315938 | 0.487430  |
| O                                                            | -1.132196    | 0.180689  | 1.250370  |
| N                                                            | 1.414408     | -0.575781 | 4.311498  |
| N                                                            | -1.523853    | -0.153323 | 4.155977  |
| N                                                            | 0.341965     | 2.010326  | 3.184884  |
| N                                                            | -1.736394    | -2.401257 | -0.041412 |
| N                                                            | 1.195201     | -2.890135 | -0.006893 |
| N                                                            | 0.108765     | -0.474199 | -1.451696 |
| H                                                            | -1.788160    | -2.748835 | -1.013816 |

|   |           |           |           |
|---|-----------|-----------|-----------|
| H | -1.851837 | -3.223994 | 0.575441  |
| H | -2.578769 | -1.818240 | 0.101819  |
| H | 0.818234  | 0.278166  | -1.459945 |
| H | 0.396894  | -1.119437 | -2.206568 |
| H | -0.760145 | -0.036920 | -1.803428 |
| H | 0.856919  | -3.493221 | -0.776408 |
| H | 2.145635  | -2.596158 | -0.291355 |
| H | 1.315599  | -3.517553 | 0.806644  |
| H | 0.717240  | 2.267558  | 4.113414  |
| H | 1.015639  | 2.405537  | 2.507075  |
| H | -0.515156 | 2.580786  | 3.085591  |
| H | 1.162541  | -0.256993 | 5.262923  |
| H | 1.497479  | -1.604872 | 4.375167  |
| H | 2.370823  | -0.215584 | 4.149774  |
| H | -1.483940 | 0.464350  | 4.984183  |
| H | -2.399065 | 0.086205  | 3.659364  |
| H | -1.652240 | -1.117333 | 4.509416  |
| H | -1.165040 | 1.048654  | 0.787343  |
| H | 2.257783  | -0.290308 | 1.331854  |

| ( $\mu$ -OH) <sub>3</sub> | IV-IV     |           |           |
|---------------------------|-----------|-----------|-----------|
| O                         | 1.268366  | -0.237534 | 1.347988  |
| Mn                        | 0.037449  | -0.044742 | 2.919750  |
| O                         | -0.177278 | -1.950037 | 2.334174  |
| Mn                        | -0.086551 | -1.383309 | 0.412546  |
| O                         | -1.162941 | 0.046400  | 1.316738  |
| N                         | 1.417876  | -0.482140 | 4.420219  |
| N                         | -1.523411 | 0.006202  | 4.302029  |
| N                         | 0.369686  | 2.001909  | 3.143574  |
| N                         | -1.751296 | -2.435244 | -0.273276 |
| N                         | 1.190245  | -2.928074 | -0.162443 |
| N                         | 0.144413  | -0.440377 | -1.432913 |
| H                         | -1.798644 | -2.564244 | -1.304054 |
| H                         | -1.835265 | -3.393287 | 0.122870  |
| H                         | -2.627664 | -1.939585 | -0.015492 |
| H                         | 0.889970  | 0.282038  | -1.383176 |
| H                         | 0.415800  | -1.065600 | -2.218261 |
| H                         | -0.710921 | 0.051208  | -1.762294 |
| H                         | 0.828516  | -3.541779 | -0.919980 |
| H                         | 2.118446  | -2.601282 | -0.499280 |
| H                         | 1.382061  | -3.561084 | 0.639309  |
| H                         | 0.727546  | 2.292861  | 4.075540  |
| H                         | 1.077345  | 2.333831  | 2.458557  |
| H                         | -0.478214 | 2.583254  | 2.985990  |
| H                         | 1.142516  | -0.180246 | 5.376433  |
| H                         | 1.572054  | -1.507822 | 4.486817  |
| H                         | 2.355301  | -0.059949 | 4.262896  |

|   |           |           |          |
|---|-----------|-----------|----------|
| H | -1.482330 | 0.787655  | 4.986804 |
| H | -2.437321 | 0.109413  | 3.817989 |
| H | -1.599207 | -0.855709 | 4.879159 |
| H | -1.449506 | 0.887163  | 0.881904 |
| H | 2.229550  | -0.459400 | 1.418721 |
| H | -0.852918 | -2.572912 | 2.699693 |

| <b>(<math>\mu</math>-OH)(<math>\mu</math>-OAc)</b> |           | <b>IV-IV</b> |           |
|----------------------------------------------------|-----------|--------------|-----------|
| Mn                                                 | 0.612469  | 2.443496     | -0.057842 |
| Mn                                                 | 0.937501  | 2.515329     | 4.015870  |
| O                                                  | 0.556414  | 3.202316     | 1.980382  |
| O                                                  | 1.178362  | 0.860942     | 0.830007  |
| O                                                  | 1.347920  | 0.898830     | 3.106737  |
| C                                                  | 1.450999  | 0.273226     | 1.964117  |
| C                                                  | 1.881879  | -1.141395    | 1.956047  |
| H                                                  | 2.531356  | -1.383254    | 2.817374  |
| H                                                  | 0.980978  | -1.799042    | 2.052902  |
| H                                                  | 2.367985  | -1.423912    | 1.004728  |
| N                                                  | -0.034449 | 4.249311     | -0.982304 |
| H                                                  | 0.629024  | 5.042701     | -0.898413 |
| H                                                  | -0.192519 | 4.161596     | -2.006034 |
| H                                                  | -0.936199 | 4.616196     | -0.623252 |
| N                                                  | 0.793351  | 1.399517     | -1.910617 |
| H                                                  | 0.753271  | 1.977959     | -2.773045 |
| H                                                  | 1.695374  | 0.887196     | -1.945439 |
| H                                                  | 0.067072  | 0.667463     | -2.027747 |
| N                                                  | 0.482437  | 4.364953     | 4.966392  |
| H                                                  | 0.696045  | 4.375313     | 5.983765  |
| H                                                  | -0.514937 | 4.646916     | 4.916139  |
| H                                                  | 1.008577  | 5.178597     | 4.595026  |
| N                                                  | 1.365905  | 1.527467     | 5.857438  |
| H                                                  | 1.020929  | 1.991788     | 6.720803  |
| H                                                  | 2.381720  | 1.376294     | 6.006669  |
| H                                                  | 0.951843  | 0.575482     | 5.851927  |
| N                                                  | 2.590993  | 3.081913     | -0.496407 |
| H                                                  | 2.741179  | 3.380205     | -1.479903 |
| H                                                  | 3.289165  | 2.333107     | -0.337252 |
| H                                                  | 2.903754  | 3.888986     | 0.069216  |
| N                                                  | -1.422628 | 1.848508     | -0.149411 |
| H                                                  | -1.878283 | 2.007694     | -1.069236 |
| H                                                  | -1.543252 | 0.836453     | 0.037950  |
| H                                                  | -2.031530 | 2.338292     | 0.527397  |
| N                                                  | -1.061564 | 1.944827     | 4.450904  |
| H                                                  | -1.352611 | 2.102459     | 5.435347  |
| H                                                  | -1.226426 | 0.935429     | 4.285799  |
| H                                                  | -1.769707 | 2.446059     | 3.888382  |
| N                                                  | 2.962257  | 3.146009     | 4.102195  |

|   |          |          |          |
|---|----------|----------|----------|
| H | 3.194368 | 3.891596 | 3.424780 |
| H | 3.621987 | 2.370073 | 3.910237 |
| H | 3.258268 | 3.530691 | 5.020536 |
| H | 0.270567 | 4.142188 | 1.986539 |

| <b>(<math>\mu</math>-OH)(<math>\mu</math>-OAc)<sub>2</sub></b> | <b>IV-IV</b> |           |           |
|----------------------------------------------------------------|--------------|-----------|-----------|
| O                                                              | 1.408323     | 2.870490  | 1.309454  |
| Mn                                                             | 0.961003     | 1.927326  | 3.041442  |
| Mn                                                             | 2.632004     | 2.126766  | -0.117107 |
| O                                                              | 1.671343     | 0.482629  | 0.015862  |
| O                                                              | 0.604695     | 0.359361  | 2.012333  |
| O                                                              | 2.817106     | 1.520139  | 3.254295  |
| O                                                              | 3.880772     | 1.653492  | 1.253137  |
| C                                                              | 0.911998     | -0.148935 | 0.858239  |
| C                                                              | 3.889588     | 1.414063  | 2.529417  |
| C                                                              | 5.158328     | 1.007524  | 3.176982  |
| C                                                              | 0.388622     | -1.486464 | 0.496516  |
| H                                                              | -0.564410    | -1.702792 | 1.005646  |
| H                                                              | 0.290377     | -1.604939 | -0.594575 |
| H                                                              | 1.120722     | -2.252514 | 0.840953  |
| H                                                              | 5.220536     | -0.104695 | 3.150235  |
| H                                                              | 6.036375     | 1.390635  | 2.632844  |
| H                                                              | 5.188245     | 1.302762  | 4.238243  |
| N                                                              | 1.387218     | 2.629406  | -1.743687 |
| N                                                              | 3.916887     | 1.165549  | -1.455409 |
| N                                                              | 3.713232     | 3.914581  | -0.430209 |
| H                                                              | 1.785372     | 3.265705  | -2.456380 |
| H                                                              | 1.106954     | 1.774392  | -2.255752 |
| H                                                              | 0.501020     | 3.071640  | -1.448526 |
| H                                                              | 3.163543     | 4.790691  | -0.401172 |
| H                                                              | 4.451434     | 4.013948  | 0.287286  |
| H                                                              | 4.215934     | 3.954835  | -1.334682 |
| H                                                              | 3.608558     | 0.182585  | -1.559753 |
| H                                                              | 3.993428     | 1.549245  | -2.413911 |
| H                                                              | 4.876602     | 1.131798  | -1.067725 |
| N                                                              | -1.106785    | 2.334842  | 2.976383  |
| H                                                              | -1.502622    | 2.863958  | 3.773124  |
| H                                                              | -1.386536    | 2.862973  | 2.133220  |
| H                                                              | -1.642176    | 1.449793  | 2.933054  |
| N                                                              | 1.225276     | 3.617898  | 4.280488  |
| H                                                              | 0.877721     | 4.517236  | 3.904974  |
| H                                                              | 2.229605     | 3.758939  | 4.482768  |
| H                                                              | 0.777495     | 3.536083  | 5.210686  |
| N                                                              | 0.631952     | 0.773601  | 4.752585  |
| H                                                              | 1.494545     | 0.726707  | 5.323739  |
| H                                                              | 0.421256     | -0.197107 | 4.460206  |
| H                                                              | -0.134097    | 1.057957  | 5.388312  |

H 1.205250 3.828707 1.262301

|    | <b>(<math>\mu</math>-O)(<math>\mu</math>-OH)(<math>\mu</math>-OAc)</b> | <b>IV-IV</b> |          |
|----|------------------------------------------------------------------------|--------------|----------|
| N  | -3.650147                                                              | 1.411324     | 2.720346 |
| Mn | -2.706130                                                              | -0.035431    | 3.967426 |
| N  | -4.490352                                                              | -0.155786    | 5.061768 |
| O  | -1.217899                                                              | 0.096228     | 2.761950 |
| C  | 0.050961                                                               | 0.099013     | 3.024512 |
| O  | 0.474307                                                               | 0.088969     | 4.249156 |
| Mn | -0.531785                                                              | -0.040668    | 5.878843 |
| O  | -1.801530                                                              | -1.128688    | 5.128096 |
| C  | 1.029147                                                               | 0.116879     | 1.910544 |
| O  | -1.883548                                                              | 1.264647     | 5.227345 |
| N  | -3.350183                                                              | -1.614949    | 2.786725 |
| H  | 1.972966                                                               | 0.590991     | 2.215770 |
| H  | 1.259585                                                               | -0.932782    | 1.634189 |
| H  | 0.609429                                                               | 0.605669     | 1.019511 |
| N  | 0.711519                                                               | -1.627245    | 6.368286 |
| N  | 0.832837                                                               | 1.400445     | 6.652409 |
| N  | -1.388269                                                              | -0.156467    | 7.788910 |
| H  | -4.365315                                                              | -1.715470    | 2.629383 |
| H  | -2.911433                                                              | -1.555778    | 1.853250 |
| H  | -3.031552                                                              | -2.504804    | 3.203572 |
| H  | -3.981193                                                              | 2.258911     | 3.208799 |
| H  | -2.982049                                                              | 1.739391     | 2.004661 |
| H  | -4.468303                                                              | 1.078406     | 2.185323 |
| H  | -4.548881                                                              | -1.035812    | 5.596889 |
| H  | -4.551924                                                              | 0.611316     | 5.748621 |
| H  | -5.363869                                                              | -0.101026    | 4.514474 |
| H  | 0.990322                                                               | -1.733245    | 7.356394 |
| H  | 0.253681                                                               | -2.513273    | 6.098989 |
| H  | 1.585138                                                               | -1.571452    | 5.819545 |
| H  | -0.733483                                                              | -0.100070    | 8.584900 |
| H  | -2.061228                                                              | 0.611240     | 7.936235 |
| H  | -1.911998                                                              | -1.035909    | 7.917565 |
| H  | 1.454052                                                               | 1.728541     | 5.895732 |
| H  | 0.395469                                                               | 2.248133     | 7.048214 |
| H  | 1.471132                                                               | 1.063189     | 7.390856 |
| H  | -1.646619                                                              | 2.179282     | 4.959671 |

|    | <b>(<math>\mu</math>-OH)<sub>2</sub>(<math>\mu</math>-OAc)</b> | <b>IV-IV</b> |          |
|----|----------------------------------------------------------------|--------------|----------|
| N  | -3.627798                                                      | 1.462978     | 2.716730 |
| Mn | -2.817373                                                      | -0.056588    | 3.902910 |
| N  | -4.639025                                                      | -0.136118    | 4.962212 |
| O  | -1.258072                                                      | 0.015154     | 2.799869 |
| C  | 0.020625                                                       | 0.033230     | 3.056362 |
| O  | 0.439005                                                       | 0.011128     | 4.291246 |



|    |           |           |          |
|----|-----------|-----------|----------|
| Mn | -0.454875 | -0.063175 | 5.980212 |
| O  | -1.870954 | -1.250054 | 5.205134 |
| C  | 0.994539  | 0.070359  | 1.948563 |
| O  | -1.926206 | 1.098980  | 5.275853 |
| N  | -3.552909 | -1.533085 | 2.618013 |
| H  | 1.943700  | 0.543006  | 2.255846 |
| H  | 1.239057  | -0.977924 | 1.652396 |
| H  | 0.574807  | 0.561942  | 1.053381 |
| N  | 0.908452  | -1.544431 | 6.545340 |
| N  | 0.831377  | 1.450824  | 6.633733 |
| N  | -1.272426 | -0.140610 | 7.922778 |
| H  | -4.450770 | -1.308956 | 2.149468 |
| H  | -2.872606 | -1.696562 | 1.852357 |
| H  | -3.714043 | -2.451549 | 3.073076 |
| H  | -3.769913 | 2.360450  | 3.217671 |
| H  | -2.986467 | 1.665386  | 1.926899 |
| H  | -4.547714 | 1.253724  | 2.285752 |
| H  | -4.691114 | -0.972619 | 5.569911 |
| H  | -4.753123 | 0.679080  | 5.590348 |
| H  | -5.504903 | -0.161762 | 4.393197 |
| H  | 1.450297  | -1.348658 | 7.407811 |
| H  | 0.479541  | -2.474883 | 6.709184 |
| H  | 1.612691  | -1.672325 | 5.794512 |
| H  | -0.598261 | -0.135681 | 8.709948 |
| H  | -1.903568 | 0.659965  | 8.103417 |
| H  | -1.845175 | -0.991569 | 8.063618 |
| H  | 1.505035  | 1.682628  | 5.879852 |
| H  | 0.351909  | 2.336238  | 6.884318 |
| H  | 1.409096  | 1.219377  | 7.463511 |
| H  | -1.814514 | 2.069875  | 5.152216 |
| H  | -1.719766 | -2.207317 | 5.028941 |
